# Supplementary material for: The decisive role of ligand metathesis in Au/Pd bimetallic catalysis
Source: Royal Society of Chemistry journal article supplement (doi:10.1039/c3cc43133a), 2013-01-01
Supplement: c3cc43133a.pdf [file c3cc43133a.pdf]

Supplementary information to:

## **Decisive Ligand Metathesis Effects in Au/Pd Bimetallic Catalysis**

Juan delPozo, Juan A. Casares\* and Pablo Espinet\*

Química Inorgánica, I. U. CINQUIMA, Facultad de Ciencias.  
Universidad de Valladolid, 47071 Valladolid (Spain).

E-mail: [casares@qi.uva.es](mailto:casares@qi.uva.es), [espinet@qi.uva.es](mailto:espinet@qi.uva.es).

### ***Table of Contents***

|                                                                                                 |       |
|-------------------------------------------------------------------------------------------------|-------|
| 1. General methods .....                                                                        | S2    |
| 2. Preparation of complex <b>9</b> and NMR data.....                                            | S2-3  |
| 3. General procedure for ligand exchange reactions between gold and palladium<br>complexes..... | S3    |
| 4. Figure 1 .....                                                                               | S3    |
| 5. <sup>1</sup> H, NMR spectra of the reactions in the Scheme 3 (main text).....                | S4-10 |
| 6. References.....                                                                              | S11   |

## Experimental section

**General methods.** All reactions were carried out under N<sub>2</sub> or Ar. All solvents were dried using standard techniques. NMR spectra were recorded on a Bruker AV 400 instrument equipped with a VT-100 variable-temperature probe, a Varian 400-MR, or a Varian 500-MR. Chemical shifts are reported in ppm from tetramethylsilane (<sup>1</sup>H), CCl<sub>3</sub>F (<sup>19</sup>F), or 85% H<sub>3</sub>PO<sub>4</sub> (<sup>31</sup>P), with positive shifts downfield, at ambient probe temperature unless otherwise stated. The temperature for the NMR probe was calibrated using ethylene glycol (T > 300K) and methanol (T < 300K) as temperature standards.<sup>1</sup> In the <sup>19</sup>F and <sup>31</sup>P spectra measured in non-deuterated solvents, a coaxial tube containing acetone-*d*<sub>6</sub> was used for the lock <sup>2</sup>H signal. The Gas Chromatography-Mass analyses were performed in a Thermo-Scientific DSQ II GC/MS Fows GL. Combustion CHN analyses were made on a Perkin-Elmer 2400 CHN microanalyzer. Unless specified, all the compounds were used from commercial sources and used without further purification. The compounds [AuCl(PPh<sub>3</sub>)],<sup>2</sup> [AuCl(AsPh<sub>3</sub>)],<sup>3</sup> [AuCl(IDM)],<sup>4</sup> [PdCl<sub>2</sub>(AsPh<sub>3</sub>)<sub>2</sub>],<sup>5</sup> [PdCl<sub>2</sub>(PPh<sub>3</sub>)<sub>2</sub>],<sup>6</sup> [PdCl<sub>2</sub>(IDM)<sub>2</sub>],<sup>7</sup> and mesityltributyltin,<sup>8</sup> were prepared by literature methods. The experimental procedure for the palladium/gold co-catalyzed Stille cross-coupling has been performed as reported.<sup>9</sup>

## Synthesis of the complexes

### [PdCl<sub>2</sub>(IDM)(AsPh<sub>3</sub>)]

A two necked flask was charged with [PdCl<sub>2</sub>(AsPh<sub>3</sub>)<sub>2</sub>] (102 mg 0.129 mmol) and [PdCl<sub>2</sub>(IDM)<sub>2</sub>] (369 mg 0.129 mmol) dissolved in 100 mL of CH<sub>3</sub>CN. The solution was stirred at 80 °C for 30 hours. The resulting yellow solution was filtered through Celite and the solvent was removed under reduced pressure giving a brown oil. This residue was dissolved in 1 mL of CH<sub>2</sub>Cl<sub>2</sub> and crystallized by the addition of 5 mL of EtOH. The solid was filtered, washed with cold EtOH (3 mL) and vacuum dried. Yield 69% (102 mg). Anal. Calcd for C<sub>23</sub>H<sub>23</sub>As<sub>2</sub>Cl<sub>2</sub>N<sub>2</sub>Pd: C, 47.65; H, 4.00; N, 4.83. Found: C, 47.29; H 3.70; N, 5.29. <sup>1</sup>H NMR (500 MHz, CD<sub>3</sub>CN) δ 7.57 (dd, *J* = 8.1, 1.2 Hz, 6H), 7.55 – 7.50 (m, 3H), 7.47 – 7.42 (m, 6H), 6.76 (s, 2H), 3.66 (s, 6H). <sup>13</sup>C NMR (126 MHz, CDCl<sub>3</sub>) δ 157.62, 133.17, 130.22, 129.09, 123.16, 37.64.

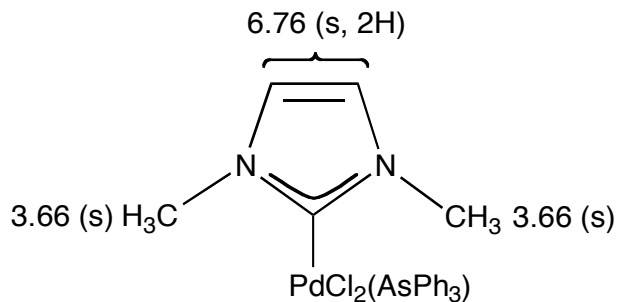

**General procedure for ligand exchange reactions between gold and palladium complexes.** A solution in  $\text{CD}_3\text{CN}$  (0.6 mL) of concentration  $2.0 \cdot 10^{-3}$  M in the gold catalyst,  $2.0 \cdot 10^{-3}$  M in the palladium catalyst and  $4.1 \cdot 10^{-3}$  M in  $\text{AsPh}_3$  was prepared in a NMR tube under nitrogen atmosphere. The tube was sealed and heated in an oil bath at  $80^\circ\text{C}$  until completion of the reaction or specified time. All reactions were monitored by  $^1\text{H}$  or  $^{31}\text{P}$  NMR spectroscopy.

**Figure 1**

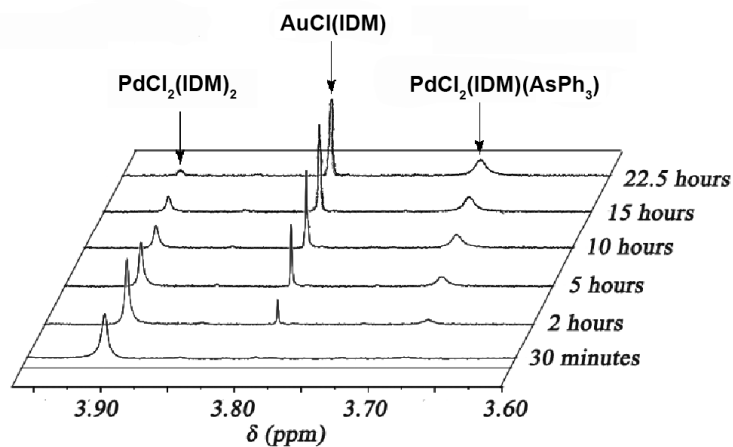

**Figure 1.** Ligand exchange between  $[\text{PdCl}_2(\text{IDM})_2]$  and  $[\text{AuCl}(\text{AsPh}_3)]$ , at  $80^\circ\text{C}$  in  $\text{CD}_3\text{CN}$ , monitored by  $^1\text{H}$  NMR on the Me signals of IDM.

### Reaction between $[\text{PdCl}_2(\text{IDM})_2]$ and $[\text{AuCl}(\text{AsPh}_3)]$

Corresponding to reaction "a" in Scheme 3 in the main text.

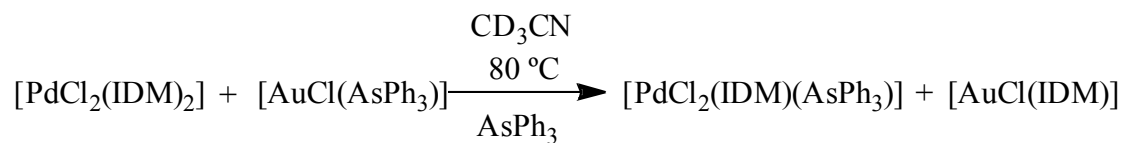

The reaction between  $[\text{PdCl}_2(\text{IDM})_2]$  and  $[\text{AuCl}(\text{AsPh}_3)]$  produces quantitatively  $[\text{AuCl}(\text{IDM})]$  and  $[\text{PdCl}_2(\text{IDM})(\text{AsPh}_3)]$  in 24 hours.

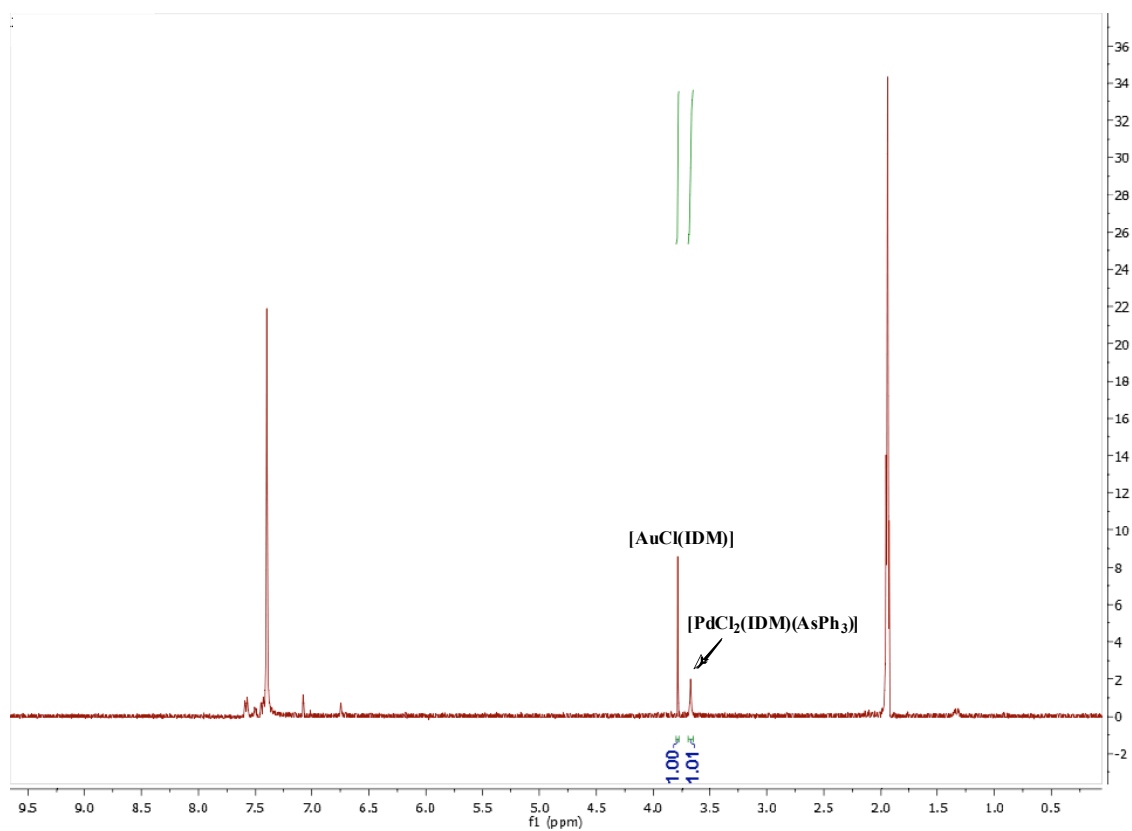

**Figure S1.** Spectra of  $[\text{PdCl}_2(\text{IDM})_2]$  and  $[\text{AuCl}(\text{AsPh}_3)]$  after 24 h in  $\text{CD}_3\text{CN}$  at  $80^\circ\text{C}$ . The signals from the methyl IDM groups in both metals (marked with arrows) have been used for quantitative purposes.

### Reaction between $[\text{PdCl}_2(\text{IDM})(\text{AsPh}_3)]$ and $[\text{AuCl}(\text{IDM})]$

Corresponding to reaction "a" in Scheme 3 in the main text.

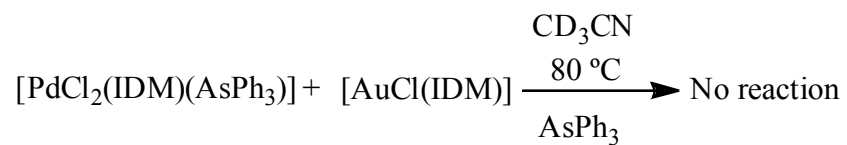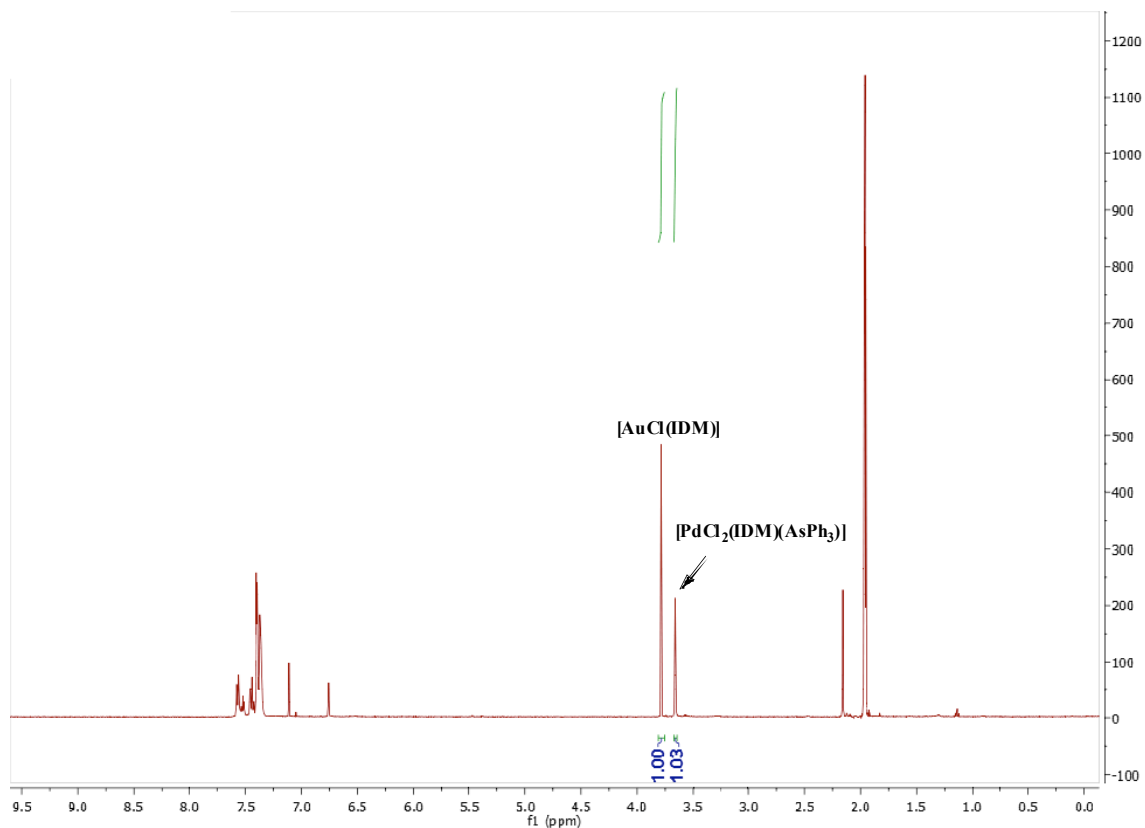

**Figure S2.** Spectra of  $[\text{PdCl}_2(\text{IDM})(\text{AsPh}_3)]$  and  $[\text{AuCl}(\text{IDM})]$  after 24 h in  $\text{CD}_3\text{CN}$  at  $80^\circ\text{C}$ .

### Reaction between $[\text{PdCl}_2(\text{IDM})(\text{AsPh}_3)]$ and $[\text{AuCl}(\text{AsPh}_3)]$

Corresponding to reaction "b" in Scheme 3 in the main text.

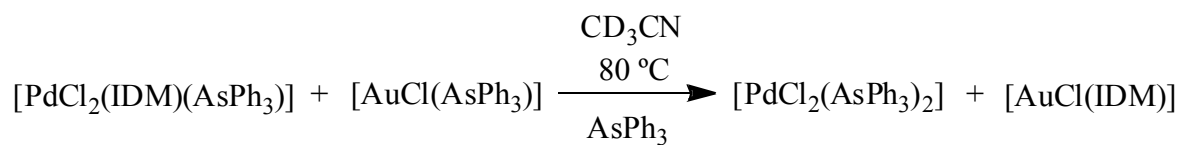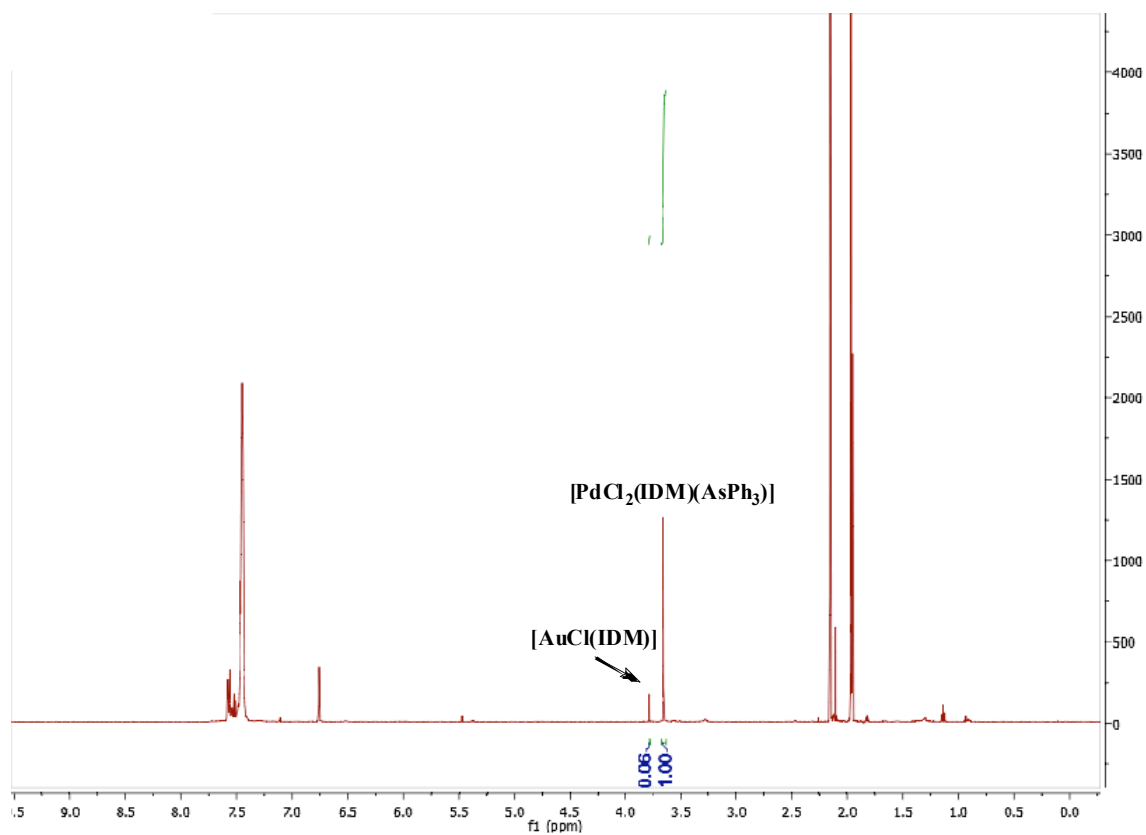

**Figure S3.** Spectra of  $[\text{PdCl}_2(\text{IDM})(\text{AsPh}_3)]$  and  $[\text{AuCl}(\text{AsPh}_3)]$  after 24 h in  $\text{CD}_3\text{CN}$  at  $80^\circ\text{C}$ .

## Reaction between [AuCl(IDM)] and [PdCl<sub>2</sub>(AsPh<sub>3</sub>)]

Corresponding to reaction "b" in Scheme 3 in the main text.

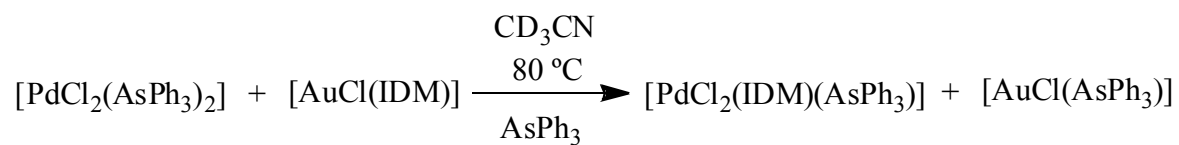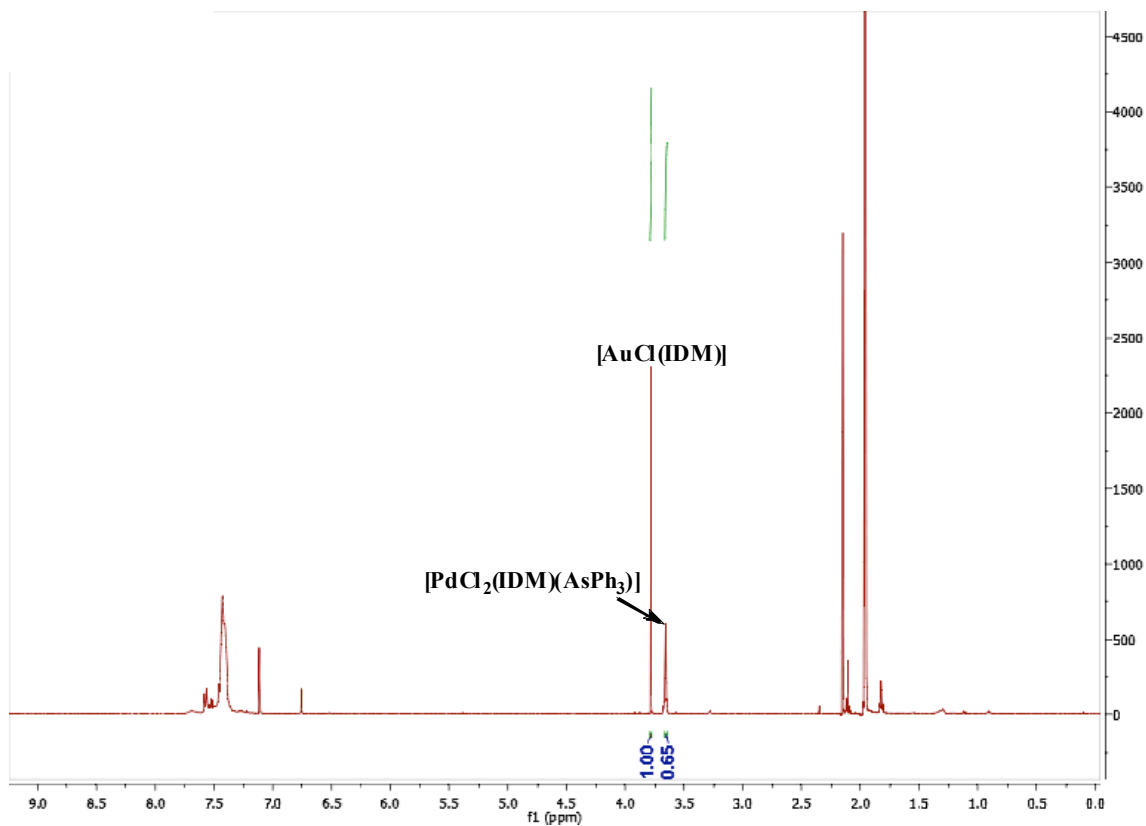

**Figure S4.** Spectra of [AuCl(IDM)] and [PdCl<sub>2</sub>(AsPh<sub>3</sub>)] after 24 h in CD<sub>3</sub>CN at 80C.

### Reaction between $[\text{PdCl}_2(\text{PPh}_3)_2]$ and $[\text{AuCl}(\text{AsPh}_3)]$ :

Corresponding to reaction "c" in Scheme 3 in the main text.

a) In  $\text{CD}_3\text{CN}$

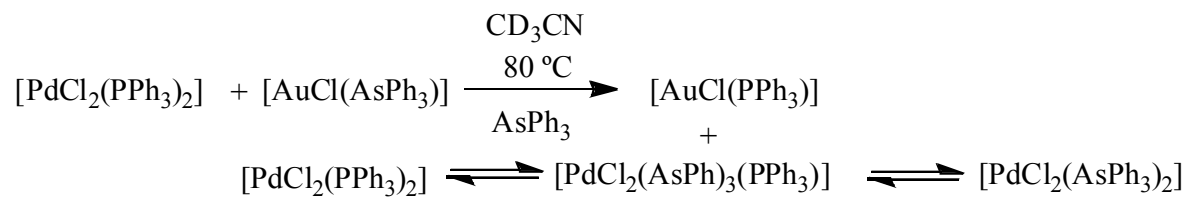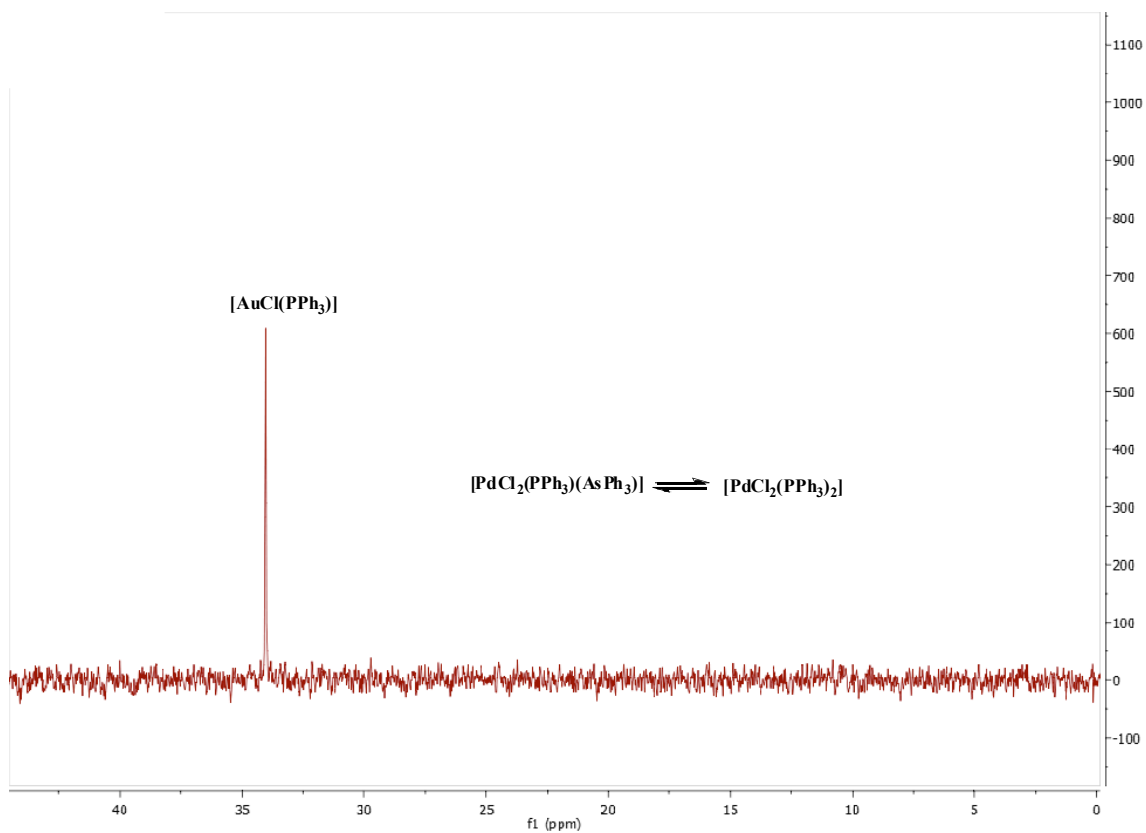

Figure S5. Spectra of  $[\text{PdCl}_2(\text{PPh}_3)_2]$  and  $[\text{AuCl}(\text{AsPh}_3)]$  in  $\text{CD}_3\text{CN}$  at  $80^\circ\text{C}$  after 5 minutes.



b) After evaporating the  $\text{CD}_3\text{CN}$  and dissolving the residue in  $\text{CDCl}_3$ .

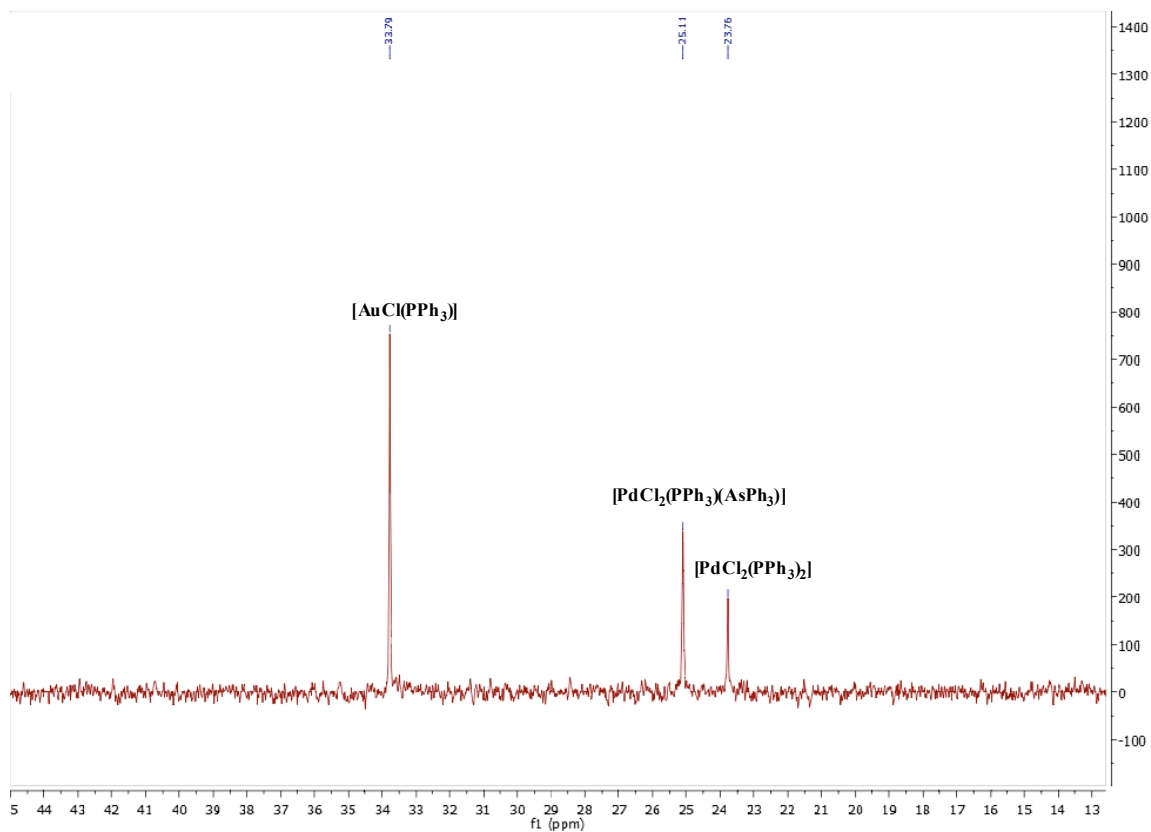

Figure S6. Spectra of  $[\text{PdCl}_2(\text{PPh}_3)_2]$  and  $[\text{AuCl}(\text{AsPh}_3)]$  in  $\text{CDCl}_3$ .

## Reaction between $[\text{PdCl}_2(\text{AsPh}_3)_2]$ and $[\text{AuCl}(\text{PPh}_3)]$

Corresponding to reaction "c" in Scheme 3 in the main text.

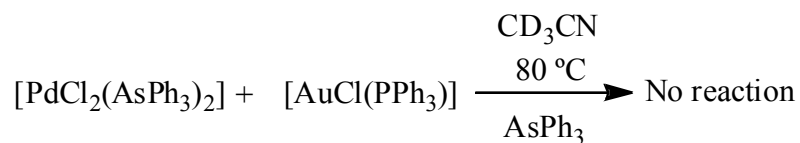

The reaction between  $[\text{PdCl}_2(\text{AsPh}_3)_2]$  and  $[\text{AuCl}(\text{PPh}_3)]$  in the reported conditions provided only  $[\text{AuCl}(\text{PPh}_3)]$  after 5 minutes in the  $^{31}\text{P}$  spectra, either in  $\text{CD}_3\text{CN}$  or  $\text{CDCl}_3$ .

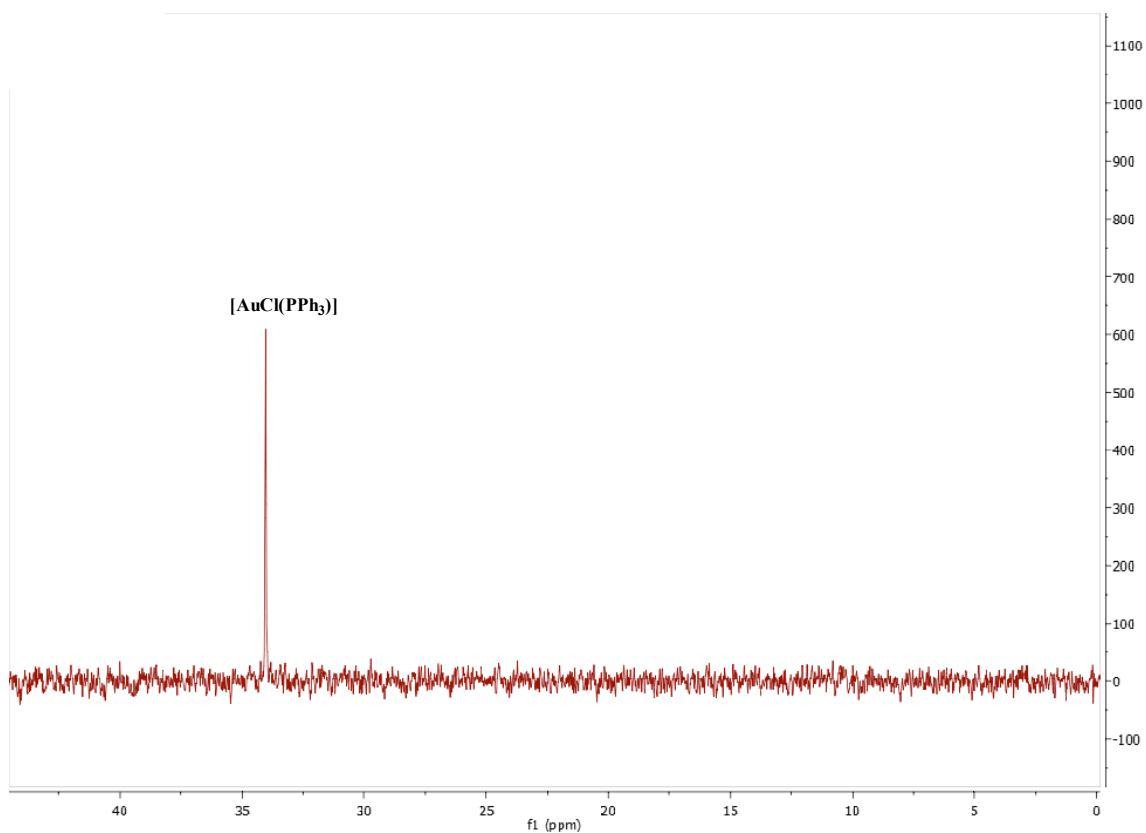

**Figure S7.** Spectra of  $[\text{PdCl}_2(\text{AsPh}_3)_2]$  and  $[\text{AuCl}(\text{PPh}_3)]$  in  $\text{CD}_3\text{CN}$  after 5 minutes at  $80^\circ\text{C}$ .

## References

---

- <sup>1</sup> C. Amman, P. Meier and A. E. Merbach, *J. Magn. Reson.* **1982**, *46*, 319-321
- <sup>2</sup> P. Sinha, A. K. Wilson, and M.A. Omary, *J. Am. Chem. Soc.*, **2005**, *127* (36), 12488–12489.
- <sup>3</sup> C. Nieto-Oberhuber, S. López, A. M. Echavarren, *J. Am. Chem. Soc.* **2005**, *127*, 6178-6179.
- <sup>4</sup> H. M. J. Wang, C. Sekhar Vasam, T. Y. R. Tsai, S. Chen, A. H. H. Chang, I. J. B. Lin, *Organometallics*, **2005**, *24* (4), 486-493.
- <sup>5</sup> A. H. Norbury, A. L. P. Sinha, *J. Inorg. Nucl. Chem.* **1973**, *35*, 1211-1218.
- <sup>6</sup> N. Miyaura, A. Suzuki, *Org. Synth. Coll.* **1993**, *Vol. 8*, 532, (note 8).
- <sup>7</sup> E. Lee, D. V. Yandulov, *J. Organometallic Chem.* **2011**, *696*, 4095-4103.
- <sup>8</sup> A. F. Littke, L. Schwarz, G. C. Fu, *J. Am. Chem. Soc.* **2002**, *124*, 6343–6348.
- <sup>9</sup> J. delPozo, D. Carrasco, M. H. Pérez-Temprano, M. García-Melchor, R. Álvarez, J. A. Casares, P. Espinet, *Angew. Chem. Int. Ed.* **2013**, *52*, 2189–2193.
